# Supplementary material
Source: PubMed Central journal article supplement (PMC6287457)
Supplement: 8a9486abeca53941b51f9a0fee4e6349_JB.00575-18-s0001.pdf [file 8a9486abeca53941b51f9a0fee4e6349_JB.00575-18-s0001.pdf]

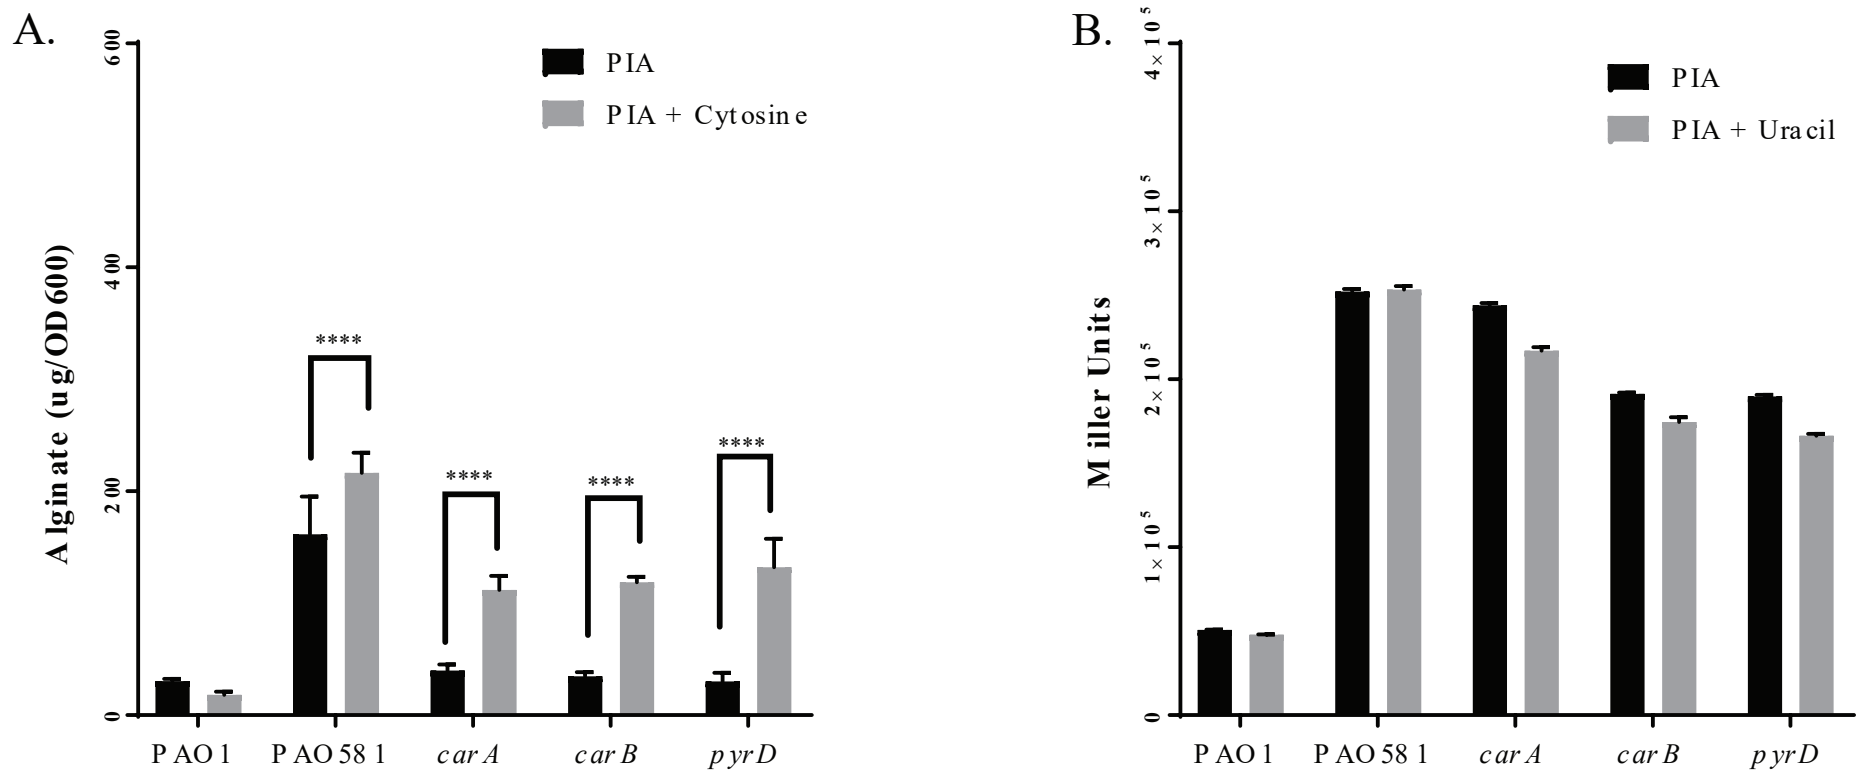

**FIG S1. Disruption of *de novo* pyrimidine biosynthesis results in loss of mucoidy.** (A) Alginate production for PAO1, PAO581, PAO581*carA*, PAO581*carB*, and PAO581*pyrD* when grown on PIA plates with cytosine at 37°C for 24 h. Alginate was collected and measured using the carbazole assay. Values shown are mean alginate  $\pm$  standard deviation of triplicate reads. (B) The  $\beta$ -galactosidase activity of *P<sub>algU</sub>* measured using pLP170-*P<sub>algU</sub>-lacZ* reporter constructs in PAO1, PAO581, PAO581*carA*, PAO581*carB*, and PAO581*pyrD* grown on PIA plates containing carbenicillin and uracil at 37°C for 24 h. Relative expression mean values shown  $\pm$  standard deviation of triplicate reads. Levels from three western blots normalized by RNA polymerase levels. Values shown are of mean ratio  $\pm$  standard deviation performed in triplicates. Two-way ANOVA used with statistical significance at  $p < 0.01$  (\*\*\*\*= $p < 0.0001$ ).

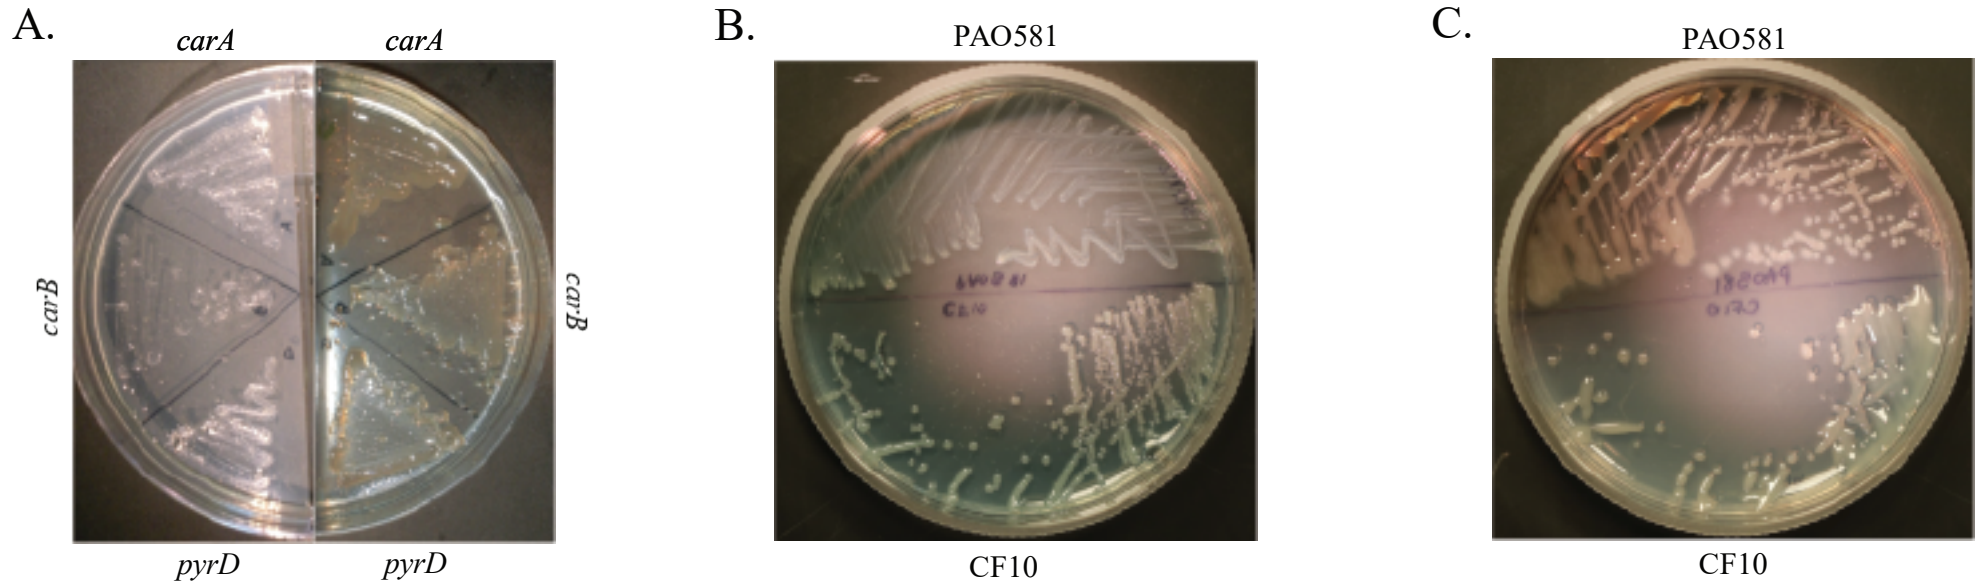

**FIG S2. Mucoic phenotype on SCFM2 media indicates that PIA medium has the same effect on maintenance of mucoic phenotype in laboratory and clinical isolates of *P. aeruginosa*.** (A) PAO581*carA*, PAO581*carB*, and PAO581*pyrD* grown on SCFM2 media (*left*) and SCFM2 media with uracil (*right*) at 37°C for 24 h. (B) PAO581(*top*) and CF10 -mucoic CF isolate (*bottom*) grown on SCFM2 media and (C) PIA at 37°C for 24 h.

A.

PAO579 + pHERD20T

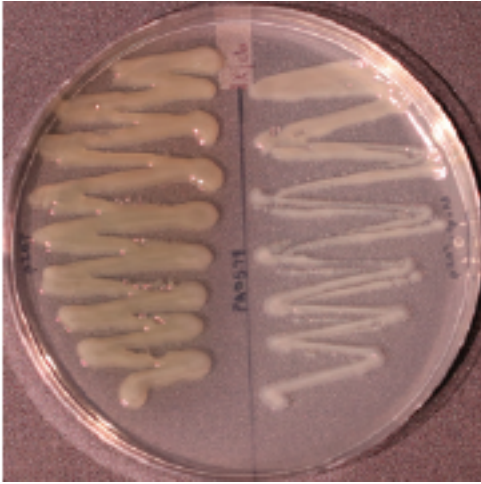

PAO579 + pHERD20T-*rpoN*

B.

CF10 + pHERD20T

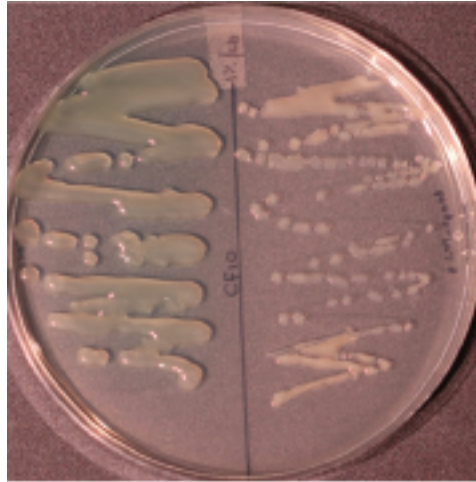

CF10 + pHERD20T-*rpoN*

C.

CF7447 + pHERD20T

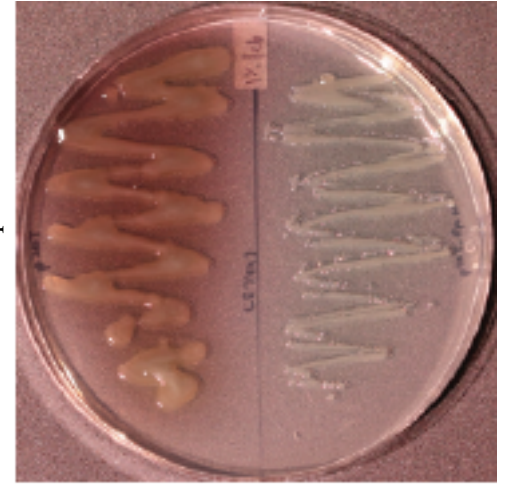

CF7447 + pHERD20T-*rpoN*

**FIG S3. Overexpression of *rpoN* results in reduction of mucoidy in CF Isolates and PAO579.** Image showing (A) PAO579, and stable mucoid CF isolates (B) CF10 and (C) CF7447 carrying pHERD20T (*left*) and pHERD20T-*rpoN* (*right*) grown on PIA plates with carbenicillin and 1% arabinose at 37°C for 36h.

|                   | Aztreonam**** | Meropenem**** | Imipenem**** | Ceftazidime | Cefepime**  | Levofloxacin | Ciprofloxacin | Tobramycin  |
|-------------------|---------------|---------------|--------------|-------------|-------------|--------------|---------------|-------------|
| <b>PAO581</b>     | 20.0 ± 0.8    | 25.0 ± 0.47   | 22.0 ± 0.82  | 19.3 ± 0.94 | 20.3 ± 1.24 | 17.0 ± 0.82  | 20.3 ± 0.47   | 9.3 ± 0.47  |
| <b>PAO581algD</b> | 24.0 ± 0      | 29.7 ± 0.47   | 30.3 ± 0.47  | 19.3 ± 0.47 | 21.7 ± 0.47 | 14.7 ± 0.47  | 21.7 ± 0.47   | 11.3 ± 0.47 |
| <b>PAO581carA</b> | 23.3 ± 0.47   | 27.7 ± 0.47   | 34.0 ± 0.82  | 25.3 ± 0.47 | 25.3 ± 1.24 | 26.0 ± 0.82  | 29.7 ± 0.47   | 17.0 ± 0.82 |
| <b>PAO581carB</b> | 25.3 ± 1.24   | 32.3 ± 2.05   | 34.7 ± 0.47  | 27.0 ± 1.41 | 29.0 ± 0.82 | 25.7 ± 2.62  | 28.3 ± 2.35   | 14.0 ± 0.82 |
| <b>PAO581pyrD</b> | 32.3 ± 0.95   | 30.3 ± 0.47   | 36.0 ± 1.41  | 34.0 ± 0.82 | 27.7 ± 2.5  | 20.0 ± 0.82  | 25.0 ± 0      | 18.7 ± 0.94 |

**Table S1: Zone of inhibition (mm) for strains grown on PIA with indicated antibiotic disk.** Antibiotic disk diffusion assay performed using BD Sensi-Disc™ according to the standard protocol. Values shown are of the average zone (mm) ± standard deviation for each strain when grown on PIA at 37°C for 24h with the indicated disk measured in triplicates. Two-way ANOVA with multiple comparisons was used to calculate the statistical significance with p<0.01 (\*\*=p<0.001, \*\*\*\*=p<0.0001).

|                   | Aztreonam**** | Meropenem**** | Imipenem**** | Ceftazidime | Cefepime**  | Levofloxacin | Ciprofloxacin | Tobramycin  |
|-------------------|---------------|---------------|--------------|-------------|-------------|--------------|---------------|-------------|
| <b>PAO581</b>     | 19.3 ± 0.94   | 25.7 ± 0.47   | 23.7 ± 0.94  | 18.7 ± 0.47 | 20.7 ± 0.47 | 18.3 ± 0.47  | 22.3 ± 0.47   | 10.3 ± 0.47 |
| <b>PAO581algD</b> | 19.7 ± 0.47   | 27.3 ± 0.94   | 23.7 ± 0.47  | 19.7 ± 0.47 | 21.3 ± 0.47 | 19.3 ± 0.47  | 20.3 ± 0.47   | 9.3 ± 0.47  |
| <b>PAO581carA</b> | 30.7 ± 0.47   | 31.7 ± 0.47   | 26.7 ± 0.47  | 25.7 ± 0.47 | 27.0 ± 0.82 | 25.3 ± 1.24  | 33.3 ± 0.47   | 16.7 ± 0.47 |
| <b>PAO581carB</b> | 29.7 ± 0.47   | 36.3 ± 0.94   | 34.7 ± 0.47  | 29.7 ± 0.47 | 29.7 ± 0.47 | 26.0 ± 0     | 27.7 ± 0.94   | 15.0 ± 0.82 |
| <b>PAO581pyrD</b> | 34.0 ± 0.82   | 35.0 ± 0.82   | 35.0 ± 0.82  | 34.3 ± 0.47 | 33.0 ± 0.82 | 17.7 ± 0.47  | 25.0 ± 0      | 18.7 ± 1.7  |

**Table S2: Zone of inhibition (mm) for strains grown on PIA with uracil with indicated antibiotic disk.** Antibiotic disk diffusion assay performed using BD Sensi-Disc™ according to the standard protocol. Values shown are of the average zone (mm) ± standard deviation for each strain when grown on PIA with uracil at 37°C for 24h with the indicated disk measured in triplicates. Two-way ANOVA with multiple comparisons was used to calculate the statistical significance with  $p < 0.01$  (\*\*\*\*= $p < 0.0001$ ).
